# Supplementary material for: Substrate-surface-structure tuned electrical and magnetic properties of PrCoO3/CaCoO2.5 superlattices
Source: Royal Society of Chemistry journal article supplement (doi:10.1039/d4ce01166j), 2025-01-01
Supplement: d4ce01166j1.pdf [file d4ce01166j1.pdf]

## Supplementary information

### **Substrate-Surface-Structure Tuned Electrical and Magnetic Properties of PrCoO<sub>3</sub>/CaCoO<sub>2.5</sub> Superlattices**

**Xiaomin Jia,<sup>a</sup> Yanbin Chen,<sup>a</sup> Ce-Wen Nan,<sup>a</sup> Jing Ma\*<sup>a</sup> and Chonglin Chen\*<sup>b</sup>**

*<sup>a</sup>School of Materials Science and Engineering, Tsinghua University, Beijing 100084, China. E-mail: ma-jing@mail.tsinghua.edu.cn*

*<sup>b</sup>Department of Physics and Astronomy, University of Texas at San Antonio, San Antonio, Texas 78249, United States. E-mail: chonglin.chen@utsa.edu*

#### **Experimental Methods**

Epitaxial [(PCO)<sub>n</sub>/(CCO)<sub>n</sub>]<sub>m</sub> superlattices (SLs) ( $n = 1, 2, 5, \text{ and } 10$ ) comprising perovskite PrCoO<sub>3</sub> (PCO) and brownmillerite CaCoO<sub>2.5</sub> (CCO), PCO/CCO bilayer films, and Pr<sub>0.5</sub>Ca<sub>0.5</sub>CoO<sub>3- $\delta$</sub>  (PCCO) thin films were grown on (001) STO, (001) LSAT, and (001) LAO substrates by pulsed laser deposition (PLD) with a 248 nm KrF excimer laser. Prior to the deposition of the film, the as-received substrates were annealed at 900 °C for 15 min. The thicknesses of all the samples were kept constant at ~32 nm. The optimized growth conditions for the PCO layer and the PCCO thin film were temperature of 750 °C, oxygen partial pressure of 5 Pa, laser energy density of 1 J/cm<sup>2</sup>, and laser frequency of 3 Hz. For the CCO layer, the optimized growth conditions were temperature of 750 °C, oxygen partial pressure of 5 Pa, laser energy density of 1.3 J/cm<sup>2</sup>, and laser frequency of 2 Hz. The target-substrate distance was fixed to 8 cm. After deposition, the films were annealed at 750 °C for 15 min at an oxygen pressure of 5 Pa before being slowly cooled to room temperature at a rate of 10 °C/min.

The crystallographic structure of the samples was examined by an X-ray diffractometer with Cu  $K\alpha$  radiation (XRD, Malvern Panalytical Empyrean). The surface microstructure was analyzed by atomic force microscopy (AFM, Cypher ES, Asylum Research). The X-ray photoelectron spectroscopy (XPS) spectra were carried out by spectrometer (ESCALAB Xi<sup>+</sup>, Thermo Fisher Scientific). The electronic transport and magnetic measurements of the samples were carried out by using a physical property measurement system (PPMS, Quantum Design) and a superconducting quantum interference device (SQUID, Quantum Design) system, respectively. The magnetic field was applied to the in-plane direction of the thin films.

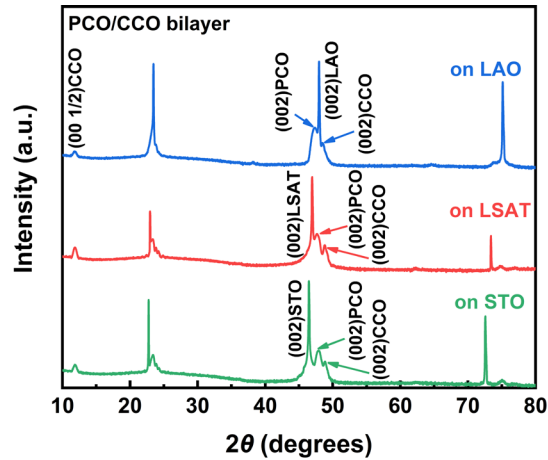

**Fig. S1** X-ray diffraction  $\vartheta$ - $2\vartheta$  patterns of the PCO/CCO bilayer films on various substrates.

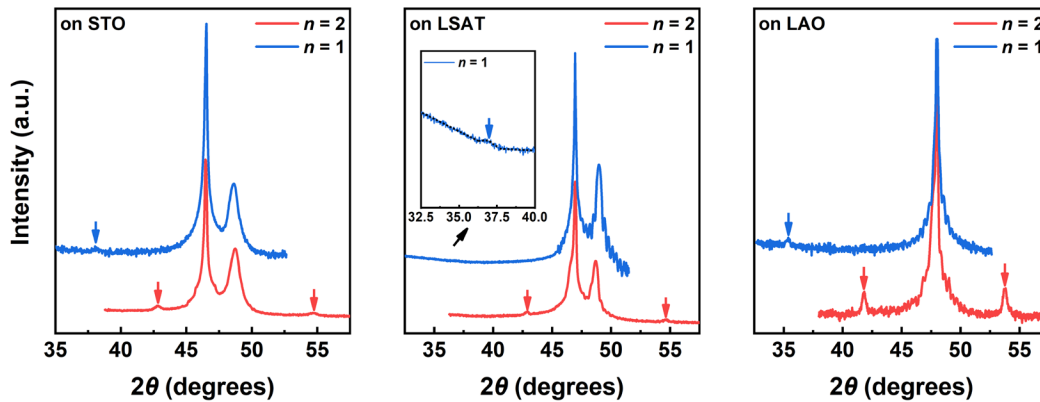

**Fig. S2** Characterization of the satellite peaks for the  $n = 1$  and  $n = 2$  SLs.

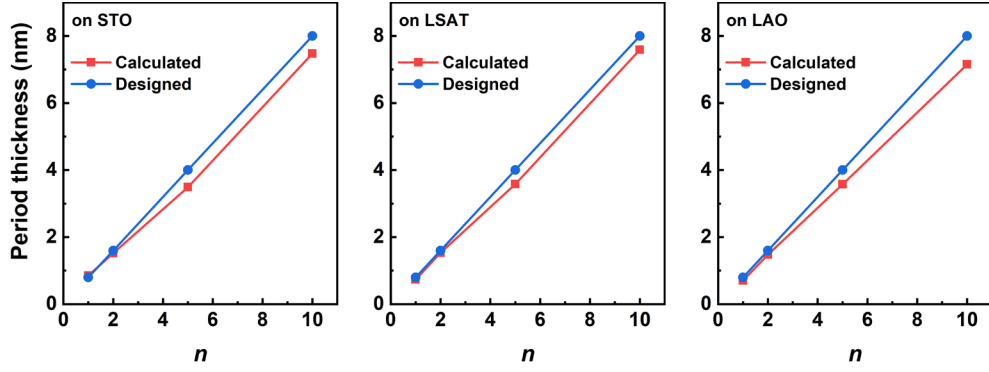

**Fig. S3** Comparison of the designed period thickness with the calculated period thickness derived from the angle intervals between satellite peaks.

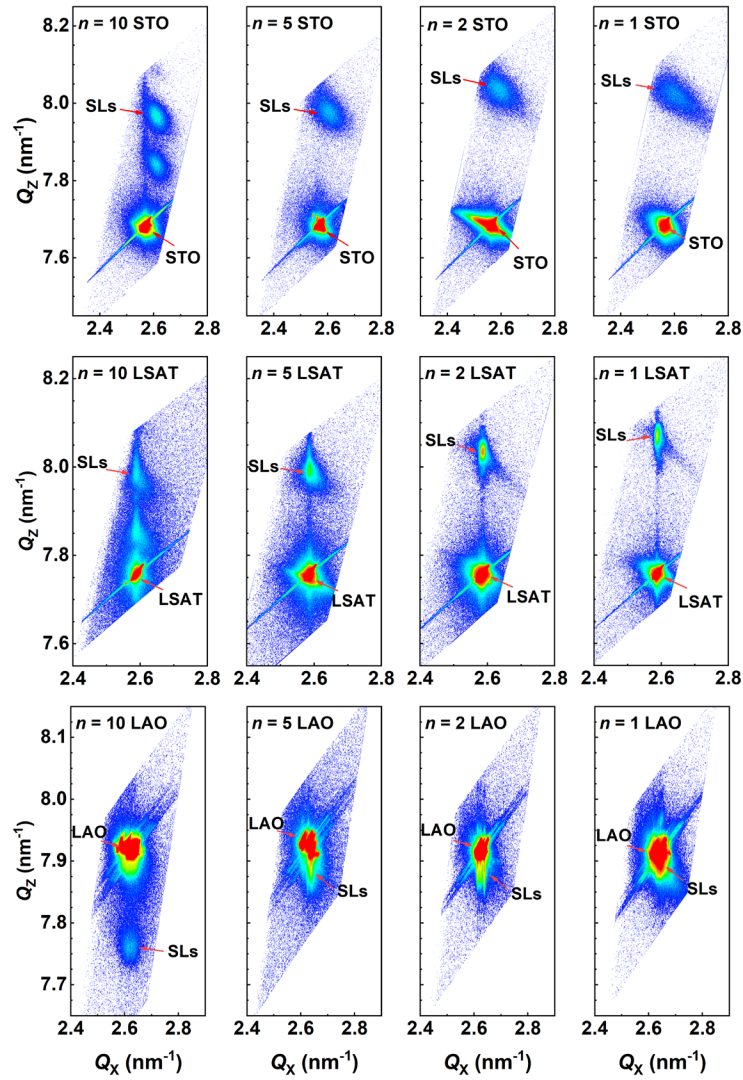

**Fig. S4** Reciprocal space mappings of the (103) reflection for the  $(\text{PCO})_n/(\text{CCO})_n$  SLs on

various substrates. The SLs are fully strained by the LSAT and LAO substrates, but can partially relieve the strain when grown on STO substrates.

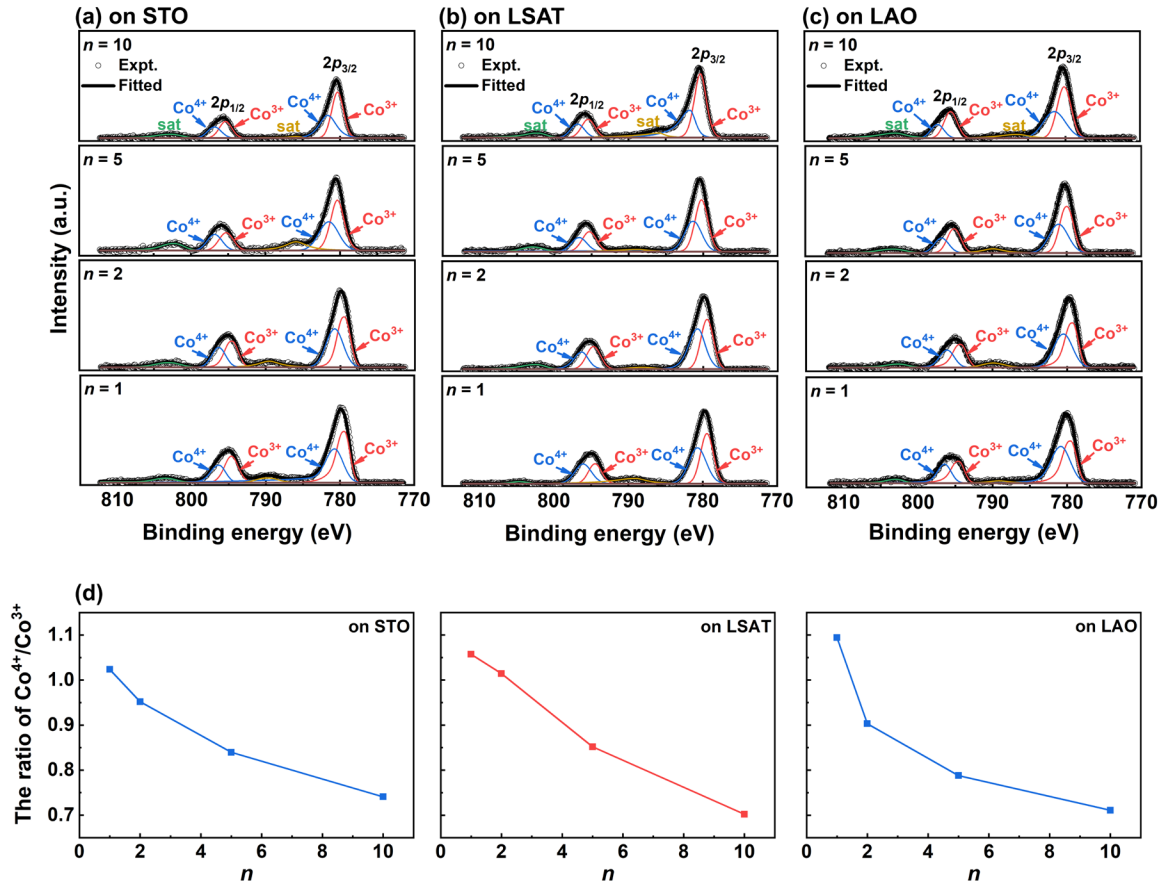

**Fig. S5** (a)-(c) Co 2p XPS core level peaks of the (PCO)<sub>n</sub>/(CCO)<sub>n</sub> SLs. (d) The calculated Co<sup>4+</sup>/Co<sup>3+</sup> ratio from the XPS results.

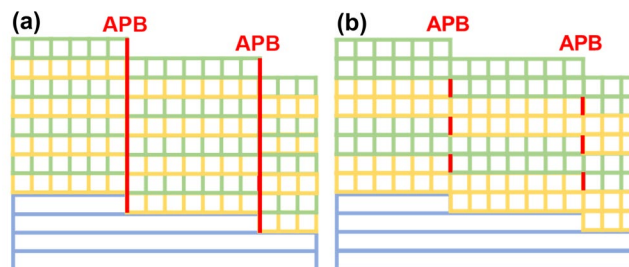

**Fig. S6** Model of SL growth on (001) STO substrates for the (a) n = 1 and (b) n = 2 SLs.
